# Supplementary material for: Single Dose of the CXCR4 Antagonist BL-8040 Induces Rapid Mobilization for the Collection of Human CD34+ Cells in Healthy Volunteers
Source: Oxford University Press journal article supplement (doi:10.1158/1078-0432.ccr-16-2919), 2017-08-23
Supplement: 10780432ccr162919-sup-174953_3_supp_4199796_vv99v1.docx [file 10780432ccr162919-sup-174953_3_supp_4199796_vv99v1.docx]

Supplemented Table 4A: Absolut number of different subsets of hematopoietic stem cells

| Number of cells per Kg |  |  |  |  |
| --- | --- | --- | --- | --- |
|  | **BL-8040** | **G-CSF** |  | **Fold increase** |
| CD34+, median (range), × 106 cells/kg | 11.22 (4.1-13.7) | 8 (3.75-11.7) |  | 1.4 |
|  |  |  |  |  |
| CD34+CD38- CD45RA- CD49f+ | 1.727x106 | 0.028x106 |  | 61.7 |
| CD34+CD38-CD45RA-CD90+CD49f+ | 146,300 | 4,000 |  | 36.6 |
| CD34+CD38-CD45RA-CD90+ | 238,700 | 4,000 |  | 59.7 |

**Supplemented Table 4B: Percentages of different subpopulations of BL-8040 mobilized cells as compared to G-CSF mobilized cells**

|  | | **% of cells from total WBC** | |  |
| --- | --- | --- | --- | --- |
| **Subpopulations** | **Markers** | **BL-8040**  **(n=8)** | **G-CSF**  **(n=5)** | **t-test** |
| **T cells** | CD3+ | 48.1 ± 5.8 | 34.8 ± 10.4 | 0.077 |
| **CD4+ T cells** | CD3+/CD4+ | 21.7 ± 4.5 | 14.3 ± 3.7 | 0.018 |
| **CD8+ T cells** | CD3+/CD8+ | 22.5 ± 6.3 | 12.9 ± 5.6 | 0.030 |
| **B cells** | CD19+ | 13.1 ± 4.26 | 12.7 ± 4.5 | 0.520 |
| **NK cells** | CD3-/CD56+ | 4.76 ± 2.8 | 2.8 ± 2.2 | 0.756 |
| **NKT cells** | CD3+/CD56+ | 1.2 ± 0.91 | 0.7 ± 0.06 | 0.168 |
| **Immature Dendritic cells (DC)** | lin-/CD11c+/CD83- | 0.95 ± 0.29 | 0.26 ± 0.11 | 0.001 |
| **Naïve CD4** | CD3+/CD4+/CD45RA+/CCR7+ | 7.78 ± 2.7 | 1.96 ±0.79 | 0.0003 |
| **Effector CD4** | CD3+/CD4+/CD45RA+/CCR7- | 1.36 ± 0.98 | 4.83 ± 0.68 | 0.001 |
| **Effector memory CD4** | CD3+/CD4+/CD45RA-/CCR7- | 4.58 ± 1.55 | 6.46 ± 2.7 | 0.209 |
| **Central memory CD4** | CD3+/CD4+/CD45RA-/CCR7+ | 8.63 ± 4.05 | 2.74 ± 1.4 | 0.004 |
| **Naïve CD8** | CD3+/CD8+/CD45RA+/CCR7+ | 12.6 ± 4.4 | 7.3 ± 2.7 | 0.040 |
| **Effector CD8** | CD3+/CD8+/CD45RA+/CCR7- | 0.23 ± 0.16 | 0.73 ± 0.39 | 0.077 |
| **Effector memory CD8** | CD3+/CD8+/CD45RA-/CCR7- | 0.4 ± 0.33 | 0.96 ± 0.38 | 0.030 |
| **Central memory CD8** | CD3+/CD8+/CD45RA-/CCR7+ | 6.5 ± 3.5 | 3.6 ± 1.9 | 0.130 |
